# Supplementary material
Source: publisher site journal article supplement (https://www.dovepress.com/get_supplementary_file.php?f=345495.docx)
Supplement: Supplementary file 1 [file get_supplementary_file.php]

**Table S1** SNPs information of the Steroid Hormone Metabolism Genes and the Hardy–Weinberg Equilibrium (HWE) in Chinese Han Population

| **Gene** | **SNP ID** | **Band** | **Position** | **Alleles A/B** | **Global MAF** | ***p*** | |
| --- | --- | --- | --- | --- | --- | --- | --- |
| **(1000Genomes)** | **HAPE-p** | **HAPE-r** |
| *STAR* | rs35602052 | 8 | 38146215 | G>A,T | T=0.0777/389 | 0.779 | 0.203 |
| rs16887217 | 8 | 38146907 | T>C | C=0.0731/366 | 0.001 | 0.356 |
| rs2843737 | 8 | 38147630 | G>A | G=0.1506/754 | 0.379 | 0.09 |
| rs2070348 | 8 | 38148460 | C>A,G,T | G=0.0152/76 | 0.289 | 0.028 |
| rs2070347 | 8 | 38148818 | C>G | G=0.0787/394 | 0.703 | 0.203 |
| rs2466147 | 8 | 38150327 | A>C,G | A=0.1474/738 | 0.779 | 0.203 |
| *HSD3B1* | rs2236780 | 1 | 119507840 | A>G,T | A=0.2810/1407 | 0.572 | 0.904 |
| rs4258257 | 1 | 119509684 | C>T | T=0.1567/785 | 0.603 | 0 |
| rs6428829 | 1 | 119512118 | A>G | A=0.1472/737 | 0.023 | 0.148 |
| rs6428830 | 1 | 119512152 | A>G | A=0.1524/763 | 0.227 | 0.178 |
| rs6203 | 1 | 119514535 | C>T | T=0.3668/1837 | 0.807 | 0.126 |
| *HSD3B2* | rs714748 | 1 | 119415260 | T>C,G | G=0.0176/88 | 0.414 | 0.782 |
| rs2793132 | 1 | 119417658 | A>G | A=0.3019/1512 | 0.738 | 0.828 |
| rs3765948 | 1 | 119420831 | T>A,C | C=0.3125/1565 | 0.301 | 0.708 |
| rs3820030 | 1 | 119421170 | T>C | C=0.0737/369 | 0.315 | 0.971 |
| rs1819698 | 1 | 119422896 | C>T | T=0.3101/1553 | 0.139 | 0.652 |
| *CYP17A1* | rs10883783 | 10 | 102831395 | T>A | A=0.1869/936 | 0.511 | 0.899 |
| rs4919686 | 10 | 102832492 | A>C | C=0.1388/695 | 0.151 | 0.955 |
| rs3740397 | 10 | 102832918 | G>C | C=0.3502/1754 | 0.982 | 0.22 |
| rs3824755 | 10 | 102836092 | G>A,C,T | C=0.2187/1095 | 0.137 | 0.257 |
| rs10786712 | 10 | 102836639 | C>T | T=0.4065/2036 | 0.625 | 0.122 |
| *CYP21A2* | rs6450 | 6 | 32039020 | G>A,T | A=0.0407/204 | 0.075 | 0.019 |
| rs6451 | 6 | 32039027 | C>A,G,T | A=0.1765/884 | 0.042 | 0.003 |
| rs6459 | 6 | 32039848 | C>G,T | T=0.1741/872 | 0.374 | 0.628 |
| *CYP11B1* | rs5301 | 8 | 142873857 | T>C | T=0.4255/2131 | 0.489 | 0.403 |
| rs6471570 | 8 | 142875989 | A>C | A=0.3153/1579 | 0.283 | 0.348 |
| rs6387 | 8 | 142877011 | C>G,T | C=0.4363/2185 | 0.622 | 0.614 |
| rs7814020 | 8 | 142877525 | A>G | G=0.3862/1934 | 0.506 | 0.021 |
| rs9657020 | 8 | 142877772 | G>A,T | T=0.1462/732 | 0.878 | 0.035 |
| rs6402 | 8 | 142879562 | G>A,T | T=0.0250/125 | 0.805 | 0.321 |
| *CYP11B2* | rs3802228 | 8 | 142910802 | A>G | A=0.4012/2009 | 0.188 | 0.321 |
| rs3097 | 8 | 142911899 | C>T | T=0.1322/662 | 0.119 | 0.321 |
| rs6433 | 8 | 142912224 | C>T | C=0.2260/1132 | 0.334 | 0.318 |
| rs6429 | 8 | 142912972 | G>C,T | C=0.4439/2223 | 0 | 0 |
| rs79410128 | 8 | 142912975 | G>A,C | C=0.4439/2223 | 0 | 0 |
| rs35733998 | 8 | 142913054 | G>A | A=0.2133/1068 | 0.247 | 0 |
| rs6421 | 8 | 142913101 | T>C | C=0.4601/2304 | 0 | 0 |
| rs57117244 | 8 | 142913566 | A>G | A=0.1769/886 | 0.127 | 0.061 |
| rs61757308 | 8 | 142915267 | T>C | C=0.1334/668 | 0 | 0 |
| rs13263682 | 8 | 142915519 | A>C | C=0.4794/2401 | 0 | 0 |
| rs61758590 | 8 | 142917502 | C>T | T=0.1356/679 | 0.722 | 0.772 |

**Table S2** Frequencies of the allele and genotype of the 7 Steroid Hormone Metabolism genes’ polymorphisms in Chinese Han population

| **Gene** | **SNP** | **Type** | **Genotype/Allele** | **HAPE-p (n %)** | **HAPE-r (n %)** | **OR (95% CI)** | **X2** | ***p*** |
| --- | --- | --- | --- | --- | --- | --- | --- | --- |
| ***STAR*** | rs35602052 | Genotype | GG | 94(0.556) | 170(0.550) |  |  |  |
|  |  | TG | 65(0.385) | 124(0.401) | 1.055(0.713-1.561) | 0.071 | 0.789 |
|  |  | TT | 10(0.059) | 15(0.049) | 0.829(0.358-1.919) | 0.191 | 0.662 |
|  | Allele | G | 253(0.749) | 464(0.751) |  |  |  |
|  |  | T | 85(0.251) | 154(0.249) | 0.988(0.728-1.341) | 0.006 | 0.938 |
|  | Dominant model | GG | 94(0.556) | 170(0.550) |  |  |  |
|  |  | TG+TT | 75(0.444) | 139(0.450) | 0.976(0.669-1.423) | 0.016 | 0.899 |
| rs2843737 | Genotype | AA | 88(0.521) | 164(0.531) |  |  |  |
|  |  | GA | 71(0.420) | 130(0.421) | 0.982(0.666-1.449) | 0.008 | 0.929 |
|  |  | GG | 10(0.059) | 15(0.049) | 0.805(0.347-1.866) | 0.257 | 0.612 |
|  | Allele | A | 247(0.731) | 458(0.741) |  |  |  |
|  |  | G | 91(0.269) | 160(0.259) | 0.948(0.702-1.280) | 0.12 | 0.729 |
|  | Dominant model | AA | 88(0.521) | 164(0.531) |  |  |  |
|  |  | GA+GG | 81(0.479) | 145(0.469) | 0.961(0.660-1.398) | 0.044 | 0.834 |
| rs2466147 | Genotype | GG | 94(0.556) | 170(0.550) |  |  |  |
|  |  | AG | 65(0.385) | 124(0.401) | 0.948(0.641-1.403) | 0.071 | 0.789 |
|  |  | AA | 10(0.059) | 15(0.049) | 1.206(0.521-2.790) | 0.191 | 0.662 |
|  | Allele | G | 253(0.749) | 464(0.751) |  |  |  |
|  |  | A | 85(0.251) | 154(0.249) | 1.012(0.745-1.375) | 0.006 | 0.938 |
|  | Dominant model | GG | 94(0.556) | 170(0.550) |  |  |  |
|  |  | AG+AA | 75(0.444) | 139(0.450) | 0.976(0.669-1.423) | 0.016 | 0.899 |
| ***HSD3B1*** | rs2236780 | Genotype | GG | 133(0.787) | 253(0.819) |  |  |  |
|  |  | AG | 33(0.195) | 53(0.172) | 1.184(0.731-1.919) | 0.473 | 0.492 |
|  |  | AA | 3(0.018) | 3(0.010) | 1.902(0.379-9.555) | 0.603 | 0.427 |
|  | Allele | G | 299(0.885) | 559(0.905) |  |  |  |
|  |  | A | 39(0.115) | 59(0.095) | 1.236(0.805-1.896) | 0.942 | 0.332 |
|  | Dominant model | GG | 133(0.787) | 253(0.819) |  |  |  |
|  |  | AG+AA | 36(0.213) | 56(0.181) | 1.223(0.766-1.953) | 0.71 | 0.399 |
| rs6428830 | Genotype | GG | 146(0.864) | 265(0.858) |  |  |  |
|  |  | AG | 21(0.124) | 44(0.142) | 0.866(0.496-1.513) | 0.255 | 0.614 |
|  |  | AA | 2(0.012) | 0(0.000) | - | 3.599 | 0.058 |
|  | Allele | G | 313(0.926) | 574(0.929) |  |  |  |
|  |  | A | 25(0.074) | 44(0.071) | 1.042(0.626-1.735) | 0.025 | 0.874 |
|  | Dominant model | GG | 146(0.864) | 265(0.858) |  |  |  |
|  |  | AG+AA | 23(0.136) | 44(0.142) | 0.949(0.551-1.633) | 0.036 | 0.85 |
| rs6203 | Genotype | TT | 59(0.349) | 130(0.421) |  |  |  |
|  |  | TC | 83(0.491) | 150(0.485) | 1.219(0.811-1.834) | 0.907 | 0.341 |
|  |  | CC | 27(0.160) | 29(0.094) | 2.051(1.117-3.767) | 5.479 | **0.019** |
|  | Allele | T | 201(0.595) | 410(0.663) |  |  |  |
|  |  | C | 137(0.405) | 208(0.337) | 1.344(1.022-1.767) | 4.478 | **0.034** |
|  | Dominant model | TT | 59(0.349) | 130(0.421) |  |  |  |
|  |  | TC+CC | 110(0.651) | 179(0.579) | 1.354(0.918-1.997) | 2.343 | 0.126 |
| ***HSD3B2*** | rs714748 | Genotype | TT | 149(0.882) | 270(0.874) |  |  |  |
|  |  | GT | 20(0.118) | 38(0.123) | 0.954(0.535-1.699) | 0.026 | 0.872 |
|  |  | GG | 0(0.000) | 1(0.003) | - | 0.551 | 0.458 |
|  | Allele | T | 318(0.941) | 578(0.935) |  |  |  |
|  |  | G | 20(0.059) | 40(0.065) | 0.909(0.522-1.581) | 0.115 | 0.735 |
|  | Dominant model | TT | 149(0.882) | 270(0.874) |  |  |  |
|  |  | GT+GG | 20(0.118) | 39(0.126) | 0.929(0.523-1.651) | 0.063 | 0.803 |
| rs2793132 | Genotype | GG | 84(0.497) | 156(0.505) |  |  |  |
|  |  | AG | 69(0.408) | 126(0.408) | 1.017(0.685-1.511) | 0.007 | 0.933 |
|  |  | AA | 16(0.095) | 27(0.087) | 1.101(0.562-2.157) | 0.078 | 0.78 |
|  | Allele | G | 237(0.701) | 438(0.709) |  |  |  |
|  |  | A | 101(0.299) | 180(0.291) | 1.037(0.776-1.386) | 0.06 | 0.806 |
|  | Dominant model | GG | 84(0.497) | 156(0.505) |  |  |  |
|  |  | AG+AA | 85(0.503) | 153(0.495) | 1.032(0.709-1.501) | 0.027 | 0.87 |
| rs3765948 | Genotype | TT | 100(0.592) | 164(0.531) |  |  |  |
|  |  | CT | 63(0.373) | 124(0.401) | 0.833(0.563-1.233) | 0.832 | 0.362 |
|  |  | CC | 6(0.036) | 21(0.068) | 0.468(0.183-1.200) | 2.593 | 0.107 |
|  | Allele | T | 263(0.778) | 452(0.731) |  |  |  |
|  |  | C | 75(0.222) | 166(0.269) | 0.776(0.568-1.061) | 2.529 | 0.112 |
|  | Dominant model | TT | 100(0.592) | 164(0.531) |  |  |  |
|  |  | CT+CC | 69(0.408) | 145(0.469) | 0.780(0.534-1.141) | 1.643 | 0.2 |
| rs3820030 | Genotype | TT | 126(0.746) | 212(0.686) |  |  |  |
|  |  | CT | 38(0.225) | 88(0.285) | 0.727(0.468-1.128) | 2.036 | 0.154 |
|  |  | CC | 5(0.030) | 9(0.029) | 0.935(0.306-2.851) | 0.014 | 0.906 |
|  | Allele | T | 290(0.858) | 512(0.828) |  |  |  |
|  |  | C | 48(0.142) | 106(0.172) | 0.799(0.552-1.158) | 1.408 | 0.235 |
|  | Dominant model | TT | 126(0.746) | 212(0.686) |  |  |  |
|  |  | CT+CC | 43(0.254) | 97(0.314) | 0.746(0.489-1.137) | 1.866 | 0.172 |
| rs1819698 | Genotype | CC | 99(0.586) | 163(0.528) |  |  |  |
|  |  | TC | 65(0.385) | 125(0.405) | 1.168(0.791-1.725) | 0.609 | 0.435 |
|  |  | TT | 5(0.030) | 21(0.068) | 2.551(0.932-6.981) | 3.53 | 0.06 |
|  | Allele | C | 263(0.778) | 451(0.730) |  |  |  |
|  |  | T | 75(0.222) | 167(0.270) | 1.298(0.950-1.774) | 2.7 | 0.1 |
|  | Dominant model | CC | 99(0.586) | 163(0.528) |  |  |  |
|  |  | TC+TT | 70(0.414) | 146(0.472) | 0.789(0.540-1.153) | 1.499 | 0.221 |
| ***CYP17A1*** | rs10883783 | Genotype | TT | 110(0.651) | 197(0.638) |  |  |  |
|  |  | TA | 51(0.302) | 99(0.320) | 0.923(0.612-1.391) | 0.148 | 0.7 |
|  |  | AA | 8(0.047) | 13(0.042) | 1.102(0.443-2.741) | 0.044 | 0.834 |
|  | Allele | T | 271(0.802) | 493(0.798) |  |  |  |
|  |  | A | 67(0.198) | 125(0.202) | 0.975 (0.700-1.359) | 0.022 | 0.881 |
|  | Dominant model | TT | 110(0.651) | 197(0.638) |  |  |  |
|  |  | TA+AA | 59(0.349) | 112(0.362) | 0.943(0.637-1.397) | 0.085 | 0.771 |
| rs4919686 | Genotype | AA | 135(0.799) | 252(0.816) |  |  |  |
|  |  | AC | 30(0.178) | 54(0.175) | 1.037(0.634-1.698) | 0.021 | 0.885 |
|  |  | CC | 4(0.024) | 3(0.010) | 2.489(0.549-11.283) | 1.492 | 0.222 |
|  | Allele | A | 300(0.888) | 558(0.903) |  |  |  |
|  |  | C | 38(0.112) | 60(0.097) | 0.849 (0.552-1.305) | 0.559 | 0.455 |
|  | Dominant model | AA | 135(0.799) | 252(0.816) |  |  |  |
|  |  | AC+CC | 34(0.201) | 57(0.184) | 0.898(0.559-1.442) | 0.198 | 0.656 |
| rs3740397 | Genotype | CC | 48(0.284) | 72(0.233) |  |  |  |
|  |  | CG | 84(0.497) | 143(0.463) | 1.135(0.721-1.787) | 0.299 | 0.585 |
|  |  | GG | 37(0.219) | 94(0.304) | 1.694(1.000-2.870) | 3.865 | **0.049** |
|  | Allele | C | 180(0.533) | 287(0.464) |  |  |  |
|  |  | G | 158(0.467) | 331(0.536) | 1.314(1.007-1.714) | 4.061 | **0.044** |
|  | Dominant model | CC | 48(0.284) | 72(0.233) |  |  |  |
|  |  | CG+GG | 121(0.716) | 237(0.767) | 0.766(0.500-1.172) | 1.512 | 0.219 |
| rs3824755 | Genotype | GG | 71(0.420) | 134(0.434) |  |  |  |
|  |  | CG | 70(0.414) | 132(0.427) | 1.001(0.665-1.506) | 0 | 0.997 |
|  |  | CC | 28(0.166) | 43(0.139) | 1.229(0.705-2.143) | 0.529 | 0.467 |
|  | Allele | G | 212(0.627) | 400(0.647) |  |  |  |
|  |  | C | 126(0.373) | 218(0.353) | 1.091(0.828-1.436) | 0.381 | 0.537 |
|  | Dominant model | GG | 71(0.420) | 134(0.434) |  |  |  |
|  |  | GC+CC | 98(0.580) | 175(0.566) | 1.057(0.723-1.545) | 0.082 | 0.775 |
| rs10786712 | Genotype | TT | 65(0.385) | 103(0.333) |  |  |  |
|  |  | TC | 82(0.485) | 139(0.450) | 0.935(0.618-1.413) | 0.102 | 0.749 |
|  |  | CC | 22(0.130) | 67(0.217) | 0.520(0.293-0.923) | 5.072 | **0.024** |
|  | Allele | T | 212(0.627) | 345(0.558) |  |  |  |
|  |  | C | 126(0.373) | 273(0.442) | 0.751(0.572-0.986) | 4.274 | **0.039** |
|  | Dominant model | TT | 65(0.385) | 103(0.333) |  |  |  |
|  |  | TC+CC | 104(0.615) | 206(0.667) | 0.800(0.542-1.181) | 1.26 | 0.262 |
| ***CYP21A2*** | rs6459 | Genotype | CC | 123(0.728) | 236(0.764) |  |  |  |
|  |  | TC | 44(0.260) | 67(0.217) | 0.794(0.512-1.230) | 1.07 | 0.301 |
|  |  | TT | 2(0.012) | 6(0.019) | 1.563(0.311-7.862) | 0.299 | 0.584 |
|  | Allele | C | 290(0.858) | 539(0.872) |  |  |  |
|  |  | T | 48(0.142) | 79(0.128) | 0.885(0.602-1.303) | 0.381 | 0.537 |
|  | Dominant model | CC | 123(0.728) | 236(0.764) |  |  |  |
|  |  | TC+TT | 46(0.272) | 73(0.236) | 1.209(0.788-1.856) | 0.755 | 0.385 |
| ***CYP11B1*** | rs5301 | Genotype | CC | 123(0.728) | 210(0.680) |  |  |  |
|  |  | TC | 41(0.243) | 92(0.298) | 1.314(0.855-2.021) | 1.556 | 0.212 |
|  |  | TT | 5(0.030) | 7(0.023) | 0.820(0.255-2.639) | 0.111 | 0.739 |
|  | Allele | C | 287(0.849) | 512(0.828) |  |  |  |
|  |  | T | 51(0.151) | 106(0.172) | 1.165(0.810-1.677) | 0.678 | 0.41 |
|  | Dominant model | CC | 123(0.728) | 210(0.680) |  |  |  |
|  |  | TC+TT | 46(0.272) | 99(0.320) | 0.793(0.524-1.201) | 1.201 | 0.273 |
| rs6471570 | Genotype | CC | 122(0.722) | 214(0.693) |  |  |  |
|  |  | AC | 41(0.243) | 89(0.288) | 0.808(0.525-1.244) | 0.938 | 0.333 |
|  |  | AA | 6(0.036) | 6(0.019) | 1.754(0.554-5.558) | 0.934 | 0.334 |
|  | Allele | C | 285(0.843) | 517(0.837) |  |  |  |
|  |  | A | 53(0.157) | 101(0.163) | 0.952(0.662-1.368) | 0.071 | 0.79 |
|  | Dominant model | CC | 122(0.722) | 214(0.693) |  |  |  |
|  |  | AC+AA | 47(0.278) | 95(0.307) | 0.868(0.573-1.313) | 0.45 | 0.502 |
| rs6387 | Genotype | TT | 81(0.479) | 162(0.524) |  |  |  |
|  |  | CT | 70(0.414) | 121(0.392) | 1.157(0.778-1.721) | 0.518 | 0.472 |
|  |  | CC | 18(0.107) | 26(0.084) | 1.385(0.717-2.672) | 0.946 | 0.331 |
|  | Allele | T | 232(0.686) | 445(0.720) |  |  |  |
|  |  | C | 106(0.314) | 173(0.280) | 1.175(0.880-1.569) | 1.199 | 0.274 |
|  | Dominant model | TT | 81(0.479) | 162(0.524) |  |  |  |
|  |  | CT+CC | 88(0.521) | 147(0.476) | 1.197(0.823-1.743) | 0.884 | 0.347 |
| rs6402 | Genotype | GG | 137(0.811) | 276(0.893) |  |  |  |
|  |  | TG | 30(0.178) | 33(0.107) | 0.546(0.320-0.932) | 5.009 | **0.025** |
|  |  | TT | 2(0.012) | 0(0.000) | -- | 3.99 | **0.046** |
|  | Allele | G | 304(0.899) | 585(0.947) |  |  |  |
|  |  | T | 34(0.101) | 33(0.053) | 0.504(0.306-0.830) | 7.467 | **0.006** |
|  | Dominant model | GG | 137(0.811) | 276(0.893) |  |  |  |
|  |  | TG+TT | 32(0.189) | 33(0.107) | 1.954(1.153-3.311) | 6.337 | **0.012** |
| ***CYP11B2*** | rs3802228 | Genotype | AA | 80(0.473) | 136(0.440) |  |  |  |
|  |  | AG | 67(0.396) | 132(0.427) | 1.159(0.774-1.735) | 0.514 | 0.473 |
|  |  | GG | 22(0.130) | 41(0.133) | 1.096(0.610-1.972) | 0.094 | 0.759 |
|  | Allele | A | 227(0.672) | 404(0.654) |  |  |  |
|  |  | G | 111(0.328) | 214(0.346) | 1.083(0.818-1.435) | 0.311 | 0.577 |
|  | Dominant model | AA | 80(0.473) | 136(0.440) |  |  |  |
|  |  | AG+GG | 89(0.527) | 173(0.560) | 1.143(0.785-1.666) | 0.487 | 0.485 |
| rs3097 | Genotype | CC | 157(0.929) | 276(0.893) |  |  |  |
|  |  | TC | 11(0.065) | 33(0.107) | 1.707(0.839-3.471) | 2.219 | 0.136 |
|  |  | TT | 1(0.006) | 0(0.000) | - | 1.751 | 0.186 |
|  | Allele | C | 325(0.962) | 585(0.947) |  |  |  |
|  |  | T | 13(0.038) | 33(0.053) | 1.410(0.732-2.718) | 1.064 | 0.302 |
|  | Dominant model | CC | 157(0.929) | 276(0.893) |  |  |  |
|  |  | CT+TT | 12(0.071) | 33(0.107) | 0.639(0.321-1.273) | 1.641 | 0.2 |
| rs6433 | Genotype | TT | 121(0.716) | 213(0.689) |  |  |  |
|  |  | CT | 42(0.249) | 90(0.291) | 0.821(0.535-1.261) | 0.809 | 0.368 |
|  |  | CC | 6(0.036) | 6(0.019) | 1.760(0.555-5.578) | 0.946 | 0.331 |
|  | Allele | T | 284(0.840) | 516(0.835) |  |  |  |
|  |  | C | 54(0.160) | 102(0.165) | 0.962(0.671-1.379) | 0.045 | 0.833 |
|  | Dominant model | TT | 121(0.716) | 213(0.689) |  |  |  |
|  |  | CT+CC | 48(0.284) | 96(0.311) | 0.880(0.583-1.329) | 0.369 | 0.544 |
| rs57117244 | Genotype | GG | 55(0.325) | 88(0.285) |  |  |  |
|  |  | AG | 74(0.438) | 138(0.447) | 0.858(0.553-1.332) | 0.467 | 0.494 |
|  |  | AA | 40(0.237) | 83(0.269) | 0.771(0.465-1.279) | 1.017 | 0.313 |
|  | Allele | G | 184(0.544) | 314(0.508) |  |  |  |
|  |  | A | 154(0.456) | 304(0.492) | 0.864(0.663-1.128) | 1.153 | 0.283 |
|  | Dominant model | GG | 55(0.325) | 88(0.285) |  |  |  |
|  |  | AG+AA | 114(0.675) | 221(0.715) | 0.825(0.550-1.238) | 0.861 | 0.353 |
| rs61758590 | Genotype | CC | 160(0.947) | 299(0.968) |  |  |  |
|  |  | TC | 9(0.053) | 10(0.032) | 0.595(0.237-1.493) | 1.249 | 0.264 |
|  | Allele | C | 329(0.973) | 608(0.984) |  |  |  |
|  |  | T | 9(0.027) | 10(0.016) | 0.601(0.242-1.494) | 1.224 | 0.269 |
|  | Dominant model | CC | 160(0.947) | 299(0.968) |  |  |  |
|  |  | TC+TT | 9(0.053) | 10(0.032) | 0.595(0.237-1.493) | 1.249 | 0.264 |

**Notes:** Data are presented as the odds ratio (OR), 95% confidence interval (CI), and p-values in the comparison between HAPE patients and the control group. A bolded p-value indicates statistical significance.

**Abbreviations:** HAPE-p: high-altitude pulmonary edema patients; HAPE-r: high-altitude pulmonary edema resistant (i.e., the control).
